# Supplementary material
Source: Elsevier journal article supplement (https://www.sciencedirect.com/science/article/pii/S0048712020301213)
Supplement: mmc1 [file S0048712020301213:mmc1.doc]

**ANEXO A. CONSENTIMIENTO INFORMADO**

**Hoja de Información al paciente para participar en un proyecto de investigación**

**Proyecto de investigación titulado**: Desarrollo de la versión española de Wisconsin Gait Scale. Análisis de fiabilidad y consistencia de los parámetros temporo-espaciales con la valoración de la marcha en pacientes con Ictus

**Investigador principal** Dr./a. María de la Paz Murciano Casas.

**Servicio** Medicina Física y Rehabilitación. **Promotores**: los propios investigadores

**Objetivos:**

Le solicitamos su participación en este proyecto de investigación cuyo objetivo principal es realizar la adaptación cultural de la Escala de Marcha de Wisconsin al castellano para su utilización en nuestro país, y en segundo lugar, comprobar las características clinimétricas de fiabilidad, validez y sensibilidad al cambio de la misma, en la valoración de pacientes post ictus

Nuestra intención es que usted reciba la información correcta y suficiente para que pueda decidir si acepta o no participar en este estudio. Para ello lea esta hoja informativa con atención y nosotros le aclararemos las dudas que le puedan surgir.

El interés de llevar a cabo el presente estudio radica en intentar realizar la evaluación de marcha de pacientes con infarto cerebral de una forma estandarizada y precisa, para de esa forma tomar decisiones terapéuticas basadas en un mismo criterio; de igual modo, la aplicación de una escala estandariza los resultados de estudios científicos, facilitando compartir información entre profesionales de distintos lugares.

**Beneficios:**

Es posible que de su participación en este estudio no se obtenga un beneficio directo. Sin embargo, la aplicación de esta escala podría beneficiar en un futuro a otros pacientes que padecen infarto cerebral y contribuir a un mejor conocimiento, diagnóstico y tratamiento de esta enfermedad.

**Procedimientos del estudio**

Si decide participar, se le realizará un análisis instrumentado de la marcha en la Unidad de Análisis de Movimiento de nuestro hospital, con el sistema Elite System (BTS), SMART-System, utilizando el protocolo establecido en nuestra Unidad de Davis Heel..

**Molestias y posibles riesgos derivados de su participación en el estudio**

La realización del estudio no provoca molestias ni tiene efectos secundarios. Se trata técnica no invasiva y que no emite radiación ionizante.

**Protección de datos personales**

De acuerdo con la  normativa vigente europea y nacional de Protección de Datos de Carácter Personal, los datos personales que se obtengan serán los necesarios para cubrir los fines del estudio.

En ninguno de los informes del estudio aparecerá su nombre, y su identidad no será revelada a persona alguna salvo para cumplir con los fines del estudio, y en el caso de urgencia médica o requerimiento legal. Cualquier información de carácter personal que pueda ser identificable será conservada en condiciones de seguridad por el Dr./a María de la Paz Murciano Casas, o por una institución designada por ella, durante un período máximo de 3 años, y realizando un encriptado de sus datos para garantizar su anonimato.

El acceso a dicha información quedará restringido al personal de investigador que forma parte del estudio, tanto el investigador principal como los promotores, designado al efecto o a otro personal autorizado que estará obligado a mantener la confidencialidad de la información.

De acuerdo con la ley vigente, tiene usted derecho al acceso de sus datos personales; asimismo, y si está justificado, tiene derecho a su rectificación y cancelación. Si así lo desea, deberá dirigirse a su médico del estudio.

De acuerdo con la legislación vigente, tiene derecho a ser informado de los datos relevantes para su salud que se obtengan en el curso del estudio. Esta información se le comunicará si lo desea; en el caso de que prefiera no ser informado, su decisión se respetará.

**Participación voluntaria y derecho de revocación del consentimiento:**

Debe saber que su participación en este estudio es voluntaria y que puede decidir no participar o cambiar su decisión y retirar el consentimiento en cualquier momento, sin que por ello se altere la relación con su médico ni se produzca perjuicio alguno en su tratamiento.

## **Consentimiento informado**

| Título del estudio: *Desarrollo de la versión española de Wisconsin Gait Scale. Análisis de fiabilidad y consistencia de los parámetros temporo-espaciales con la valoración de la marcha en pacientes con Ictus*  Yo _____ (nombre y apellidos del paciente) _____________________    He leído la hoja de información que se me ha entregado.  He podido hacer preguntas sobre el estudio.  He hablado con:Dra. María de la Paz Murciano Casas.  Comprendo que mi participación es voluntaria.  Comprendo que puedo retirarme del estudio:    1. Cuando quiera  2. Sin tener que dar explicaciones    3. Sin que esto repercuta en mis cuidados médicos  Presto libremente mi conformidad para participar en el estudio.  Accedo a que los médicos responsables de este estudio me contacten en el futuro en caso de que se estime oportuno para añadir nuevos datos a los recogidos: **Si No**    Fecha y firma del participante  Fecha y firma del investigador  Fecha y firma del familiar/representante *(si procede)* |
| --- |

**APARTADO PARA LA DENEGACIÓN O REVOCACION DEL CONSENTIMIENTO INFORMADO** (FIRMA DEL PACIENTE Y/O FAMILIAR/REPRESENTANTE)

Yo,.....................................................................................................................................o el familiar/representante *(si procede)*…………………………………………… del paciente (nombre)………………………………………………………………. deniego/revoco el consentimiento de participación en el estudio, arriba firmado.

Esta revocación de consentimiento informado supone que desde la fecha en la que se firma el mismo no se podrá recoger más datos médicos sin que esto perjudique a la conservación de los datos resultantes de las investigaciones que se hubiesen realizado con carácter previo.

Fecha de la denegación/revocación.........................................

Firma:

**ANEXO B. WISCONSIN GAIT SCALE (VERSION ORIGINAL INGLESA)**

**Abstract**: Wisconsin Walking Scale can be used to assess walking problems in pacient with hemiplegia after stroke. It also, can be use to monitor the rehabilitation program efectivity. The authors belong to Winsconsin University.

**Subject observation:**

1.Walking to the observer.

2.Getting away the observer.

3.From the side.

**Measures (14 submeasures):**

4.Affected leg leaning phase (5 submeasures)

5.Affected leg lifting pase (2 submeasures)

6.Affected leg swinging phase (6 submeasures)

7.Affected leg initial contact (1 submeasure)

**Leaning phase submeasures:**

8.Manual assistance use for walking

9.Leaning time of affected side.

10.Step length of non-affected side.

11.Affected side load response (with or without assistance for walking).

12.Wide leanning (distance measurement between both feet before the lifting of affected foot).

**Lifting phase submeasures:**

(6) Faltering (pause before the affected leg step)

(7) Hip extension of the affected side (observe gluteal folds from behind the subject)

**Swinging phase submeasures**

(8) External rotation during inicial swinging

(9) Circumduction in the middle oscillation (observe the course of the affected heel)

(10) Hip elevation in half swinging

(11) Knee flexion from lifting to half swinging

(12) Foot lifting

(13) Pelvic rotation

**Affected leg initial contact submeasure**

(14)  Foot inicial contact

| **Submeasure** | **Result** | **Score** |
| --- | --- | --- |
| Manual assistance use for walking | Without manual assistance | 1 |
|  | Manual assistance minimal use for walking | 2 |
|  | Manual assistance minimal use for walking with base ampliation | 3 |
|  | Marked use | 4 |
|  | Marked use with base ampliation | 5 |
| Leaning phase submeasures | Equal (Affected side leaning time is the same as non-affected side during monopodal leaning) | 1 |
|  | Unequal | 2 |
|  | Very brief | 3 |
| Step length of non-affected side | Front step (non-affected Heel lift and forward in front of affected foot fingers) | 1 |
|  | Non foot lifting | 2 |
|  | Step to (non affected foot is behind, or at the same position of affected foot, but not in front). | 3 |
| **Affected side load response (with or without assistance for walking).** | Complete load changing  (The head and the trunk lean to affected foot during monopodal leaning phase) | 1 |
|  |
|  | Declining inclination | 2 |
|  | Displacement very limited | 3 |
| Wide leanning | Normal (up to one shoe wide between the feet) | 1 |
|  | Moderate (up to 2 shoes between the feet) | 2 |
|  | Wide (more that 2 shoes between the feet) | 3 |
| **Faltering** | None (good movement foward without faltering) | 1 |
|  | Mild | 2 |
|  | Marked faltering | 3 |
| Hip extension of the affected side | Same extension (Hip with same extension during lifting phase; maintains upright posture during lifting) | 1 |
|  | Light flexion | 2 |
|  | Marked extension | 3 |
| External rotation during inicial swinging | Same as non-affected leg | 1 |
|  | Rotation increase | 2 |
|  | Marked | 3 |
| Circumduction in the middle oscillation | None (No more affected foot adduccion that non-affected foot during swinging phase) | 1 |
|  | Moderate | 2 |
|  | Marked | 3 |
| Hip elevation in half swinging | None (pelvis descends lightly during swinging) | 1 |
|  | Elevation | 2 |
|  | Jump ? | 3 |
| Knee flexion from lifting to half swinging | Normal ( Affected knee has the same flexion as non-affected knee) | 1 |
|  | Any | 2 |
|  | Minimum | 3 |
|  | None | 4 |
| Fingers feet lifting | Normal ( Foot fingers lift from the floor during all swinging) | 1 |
|  | Light Drag | 2 |
|  | Marked | 3 |
| External pelvic rotation in final swinging | Forward ( pelvis rotates forward to prepare inicial contact) | 1 |
|  | Neutral | 2 |
|  | Retracted | 3 |
| Foot inicial contact | Heel inicial contact (heel does inicial contact with the floor) | 1 |
|  | Sole contact | 2 |
|  | Heel non-contact | 3 |

**ANEXO C. ESCALE DE MARCHA WISCONSIN EN CASTELLANO**

**Resumen**: La Escala de marcha de Wisconsin se puede usar para evaluar los problemas de la marcha que experimenta un paciente con hemiplejia tras ictus. Puede ser utilizarse para monitorizar la efectividad del programa de rehabilitación. Los autores pertenecen a la Universidad de Winsconsin.

**Observación del sujeto:**

1. Andando hacia el observador.
2. Alejándose del observador.
3. Desde el lateral.

**Medidas (14 submediciones):**

1. Fase de apoyo de la pierna afectada (5 medidas).
2. Despegue de la pierna afectada (2 submedidas).
3. Fase de balanceo de la pierna afectada (6 submedidas)
4. Contacto inicial de la pierna afectada (1 submedida)

**Submedidas de la fase de apoyo:**

1. Uso de ayuda manual para la marcha.

2. Tiempo de apoyo en el lado afectado.
 3. Longitud del paso del lado sano.
 4. Respuesta a la carga del lado afecto con o sin ayuda para la marcha.
 5. Anchura de apoyo (distancia medida entre los pies antes del despegue del
 pie afectado).

**Submedidas de despegue:** 6. Titubeo (pausa previa al avance de la pierna afecta).
 7. Extensión de la cadera del lado afectado (observar pliegues glúteos desde
 detrás del sujeto)

**Submedidas de la fase de balanceo:** 8. Rotación externa durante la oscilación inicial.
 9. Circundicción en la oscilación media (observar el recorrido del talón
 afectado).
 10. Elevación de la cadera en oscilación media.
 11. Flexión de rodilla desde el despegue a la oscilación media.
 12. Despegue del pie.
 13. Rotación pélvica.
**Submedida del contacto inicial de la pierna afecta:**

14. Contacto inicial del pie.

| **Submedida** | **Resultado** | **Puntuación** |
| --- | --- | --- |
| **Uso de ayuda de marcha manual** | Sin ayuda en la marcha | 1 |
|  | Uso mínimo de ayuda para la marcha | 2 |
|  | Uso mínimo de ayuda con aumento de base | 3 |
|  | Uso marcado | 4 |
|  | Uso marcado con aumento de base | 5 |
| **Fase de apoyo con el lado afecto** | El tiempo de apoyo sobre el lado afecto durante el apoyo monopodal es el mismo que en el lado sano | 1 |
|  | Desigual | 2 |
|  | Muy breve | 3 |
| **Longitud del paso del lado no afecto** | Paso hacia delante (el talón del pie sano despega y avanza por delante de los dedos del pie afecto) | 1 |
|  | Ausencia de despegue del pie. | 2 |
|  | Paso hacia (el pie sano se coloca por detrás o a la altura del pie afecto, pero no por delante). | 3 |
| **Respuesta a la carga del lado afecto (con o sin ayuda de marcha)** | Cambio complete del peso (la cabeza y el tronco se inclinan lateralmente sobre el pie afectado durante la fase de apoyo monopodal). | 1 |
|  | Descenso de la inclinación | 2 |
|  | Desplazamiento muy limitado | 3 |
| **Distancia en el apoyo** | Normal (hasta un zapato de anchura entre los pies) | 1 |
|  | Moderada (hasta 2 zapatos de anchura) | 2 |
|  | Amplia (más de 2 zapatos de ancho) | 3 |
| **Titubeo** | Ninguno (buen movimiento hacia delante sin que haya vacilación) | 1 |
|  | Leve | 2 |
|  | Titubeo marcado | 3 |
| **Extensión de cadera del lado afecto** | Igual extensión (caderas igualmente extendidas durante la fase de impulso para el despegue; mantiene la postura erguida durante el despegue de los dedos) | 1 |
|  | Ligera flexion | 2 |
|  | Marcada extensión | 3 |
| **Rotación externa durante la oscilación inicial** | Igual que la pierna sana | 1 |
|  | Aumento de la rotación | 2 |
|  | Marcada | 3 |
| **Circundicción en fase de balanceo medio** | Ninguna (aducción del pie afecto no más que con el pie sano durante la fase de balanceo) | 1 |
|  | Moderado | 2 |
|  | Marcado | 3 |
| **Elevación de cadera en balanceo medio** | Ninguna (pelvis desciende levemente durante el balanceo) | 1 |
|  | Elevación | 2 |
|  | Salto | 3 |
| **Flexión de rodilla desde el despegue a la oscilación media** | Normal (la rodilla afectada flexiona igual que la no afectada) | 1 |
|  | Alguna | 2 |
|  | Mínima | 3 |
|  | Ninguna | 4 |
| **Despegue de los dedos de los pies** | Normal (los dedos del pie despegan del suelo durante toda la oscilación) | 1 |
|  | Ligero arrastre | 2 |
|  | Marcado arrastre | 3 |
| **Rotación de la pelvis en el balanceo terminal** | Hacia delante (la pelvis rota hacia delante para preparar el contacto inicial). | 1 |
|  | Neutral | 2 |
|  | Retraída | 3 |
| **Contacto inicial del pie** | Contacto inicial del talón (el talón hace el contacto inicial con el suelo) | 1 |
|  | Contacto con la planta | 2 |
|  | No contacta el talón | 3 |
